# Supplementary material for: Myocardial Energetics in Obesity: Enhanced ATP Delivery Through Creatine Kinase With Blunted Stress Response
Source: PubMed Central journal article supplement (PMC7144750; doi:10.1161/circulationaha.119.042770), 2020-04-06

## Supplemental Material

**Supplemental Table 1: Correlation table demonstrating associations with PCr/ATP and creatine kinase kf:**

|                                              | PCr/ATP |                  | $k_f^{CK} (s^{-1})$ |              |
|----------------------------------------------|---------|------------------|---------------------|--------------|
|                                              | r       | p                | r                   | p            |
| Age (y)                                      | -0.242  | <b>0.044</b>     | -0.182              | 0.137        |
| BMI (kg/m <sup>2</sup> )                     | -0.437  | <b>&lt;0.001</b> | 0.329               | <b>0.006</b> |
| Body fat (% total)                           | -0.364  | <b>0.009</b>     | 0.393               | <b>0.006</b> |
| Abdominal visceral fat (cm <sup>2</sup> )    | -0.304  | <b>0.021</b>     | 0.316               | <b>0.020</b> |
| Epicardial adipose tissue (cm <sup>3</sup> ) | 0.126   | 0.597            | 0.048               | 0.846        |
| Myocardial triglyceride content (%)          | -0.456  | <b>0.002</b>     | 0.274               | 0.079        |
| Fasting glucose (mg/dl)                      | -0.376  | <b>0.006</b>     | 0.288               | <b>0.043</b> |
| Fasting insulin (mIU/ml)                     | -0.067  | 0.638            | 0.188               | 0.196        |
| HOMA- IR                                     | -0.069  | 0.644            | 0.167               | 0.269        |
| LV EDV (ml)                                  | 0.034   | 0.777            | 0.084               | 0.497        |
| LVEF (%)                                     | -0.234  | 0.052            | 0.140               | 0.255        |
| LV E/e'                                      | -0.117  | 0.462            | 0.117               | 0.726        |
| LV stroke work (l/mmHg)                      | -0.089  | 0.495            | 0.309               | <b>0.016</b> |
| PCr/ATP                                      | -       | -                | -0.127              | 0.306        |
| $k_f^{CK} (s^{-1})$                          | -0.127  | 0.306            | -                   | -            |
| BNP (pg/ml)                                  | -0.035  | 0.798            | -0.080              | 0.569        |
| Peak VO <sub>2</sub> (m/kg/ min)             | 0.468   | <b>&lt;0.001</b> | -0.322              | <b>0.020</b> |
| Absolute max VO <sub>2</sub> (ml/min)        | 0.309   | <b>0.014</b>     | -0.168              | 0.233        |

**Supplemental Table 2: Comparison of baseline characteristics of those in the obese cohort who completed dobutamine stress and those who did not (anthropomorphic and metabolic findings)**

|                                      | Completed dobutamine (n=17) | Did not complete dobutamine (n=28) | p     |
|--------------------------------------|-----------------------------|------------------------------------|-------|
| Age (y)                              | 49±14                       | 49±14                              | 0.935 |
| Female n (%)                         | 11 (65)                     | 22 (79)                            | 0.393 |
| BMI (kg/m <sup>2</sup> )             | 36±5                        | 35±4                               | 0.265 |
| Weight (kg)                          | 103±18                      | 99±14                              | 0.367 |
| Body fat mass (kg)                   | 47±11                       | 42±9                               | 0.148 |
| Heart rate (bpm)                     | 65±9                        | 67±15                              | 0.537 |
| Systolic blood pressure (mmHg)       | 134±15                      | 135±19                             | 0.919 |
| Diastolic blood pressure (mmHg)      | 80±12                       | 86±12                              | 0.916 |
| <b>Metabolic status:</b>             |                             |                                    |       |
| Visceral fat area (cm <sup>2</sup> ) | 143±60                      | 160±88                             | 0.531 |
| Liver fat (%)                        | 7±7                         | 7±6                                | 0.826 |
| Myocardial triglyceride (%)          | 2.1±2.4                     | 2.5±1.3                            | 0.607 |
| Haemoglobin (g/dL)                   | 141±11                      | 138±13                             | 0.521 |
| Total cholesterol (mg/dL)            | 201±43                      | 217±35                             | 0.196 |
| Triglycerides (mg/dL)                | 66±31                       | 70±35                              | 0.765 |
| Fasting glucose (mg/dL)              | 95±11                       | 95±13                              | 0.891 |
| Fasting insulin (mIU/L)              | 14±8                        | 15±16                              | 0.865 |
| HOMA-IR                              | 3.6±2.4                     | 3.9±5.0                            | 0.908 |
| BNP (pg/mL)                          | 5.2±4.0                     | 5.6±4.6                            | 0.829 |
| Leptin (ng/mL)                       | 56±40                       | 56±28                              | 0.968 |

**Supplemental Table 3: Comparison of baseline characteristics of those in the obese cohort who completed dobutamine stress and those who did not (cardiac and exercise parameters)**

|                                                                 | Completed dobutamine (n=17) | Did not complete dobutamine (n=28) | p            |
|-----------------------------------------------------------------|-----------------------------|------------------------------------|--------------|
| <b>Cardiac parameters:</b>                                      |                             |                                    |              |
| <b>Left ventricle:</b>                                          |                             |                                    |              |
| End-diastolic volume (ml)                                       | 168±38                      | 151±30                             | 0.130        |
| End-systolic volume (ml)                                        | 60±14                       | 52±13                              | 0.100        |
| Cardiac output (l/min)                                          | 6.9±1.1                     | 6.3±2.2                            | 0.379        |
| Mass (g)                                                        | 119±32                      | 110±27                             | 0.299        |
| Ejection fraction (%)                                           | 65±3                        | 65±5                               | 0.540        |
| Mass-volume ratio                                               | 0.7±0.1                     | 0.7±0.1                            | 0.641        |
| E/e'                                                            | 9.3±2.8                     | 8.9±1.8                            | 0.593        |
| Left atrial volume (mls)                                        | 85±31                       | 75±14                              | 0.260        |
| <b>Right ventricle:</b>                                         |                             |                                    |              |
| End-diastolic volume (ml)                                       | 162±41                      | 144±36                             | 0.165        |
| End-systolic volume (ml)                                        | 54±18                       | 47±16                              | 0.185        |
| Ejection fraction (%)                                           | 67±5                        | 68±6                               | 0.607        |
| <b>Myocardial energetics:</b>                                   |                             |                                    |              |
| PCr/ATP                                                         | 1.9±0.3                     | 1.9±0.3                            | 0.701        |
| CK forward rate constant (s <sup>-1</sup> )                     | 0.22±0.07                   | 0.25±0.05                          | 0.199        |
| ATP delivery (PCr x k <sub>f</sub> <sup>CK</sup> ) (μmol/g/sec) | 2.4±0.9                     | 2.7±0.7                            | 0.215        |
| <b>Exercise capacity:</b>                                       |                             |                                    |              |
| Peak VO <sub>2</sub> (ml/kg/min)                                | 22±5                        | 19±5                               | 0.162        |
| VO <sub>2</sub> indexed to fat-free mass (ml/kg/min)            | 39±7                        | 34±7                               | <b>0.031</b> |
| Percentage of predicted VO <sub>2</sub> achieved (%)            | 89±26                       | 87±14                              | 0.816        |
| Exercise time (min)                                             | 9±2                         | 9±2                                | 0.914        |
| RER                                                             | 1.1±0.1                     | 1.1±0.1                            | 0.915        |
| VE/VCO <sub>2</sub>                                             | 25±4                        | 27±4                               | 0.288        |
| Heart rate reserve                                              | 0.8±0.1                     | 0.8±0.2                            | 0.805        |
| Six minute walk test distance (m)                               | 586±65                      | 567±77                             | 0.478        |

**Supplemental Table 4: Haemodynamic response to stress**

|                                               | <b>Non-obese<br/>n=27</b> | <b>Obese<br/>n=17</b> | <b>p</b>     |
|-----------------------------------------------|---------------------------|-----------------------|--------------|
| Total duration dobutamine (mins)              | 24±3                      | 25±2                  | 0.676        |
| Resting heart rate (bpm)                      | 57±7                      | 64±9                  | <b>0.012</b> |
| Stress heart rate (bpm)                       | 113±8                     | 114±10                | 0.858        |
| Average heart rate (% maximum)                | 64±4                      | 67±6                  | 0.100        |
| Resting systolic blood pressure (mmHg)        | 121±17                    | 133±15                | <b>0.029</b> |
| Maximum systolic blood pressure (mmHg)        | 151±14                    | 168±19                | 0.005        |
| Resting RPP (mmHg*bpm)                        | 6899±1293                 | 8591±1595             | <b>0.001</b> |
| Stress RPP (mmHg*bpm)                         | 17264±1793                | 19071±2085            | <b>0.010</b> |
| Relative increase in RPP (%)                  | 167±60                    | 132±38                | 0.079        |
| Resting LV ejection fraction (%)              | 62±5                      | 66±4                  | <b>0.003</b> |
| Stress LV ejection fraction (%)               | 83±4                      | 82±6                  | 0.638        |
| Relative increase in LV ejection fraction (%) | 21±4                      | 16±7                  | <b>0.031</b> |
| Relative increase in LV stroke work (%)       | 24±35                     | 21±27                 | 0.818        |

**Supplemental Table 5: Correlation table of change in PCr/ATP and creatine kinase  $k_f$  with weight loss and changes in other parameters**

|                                                | $\Delta$ PCr/ATP |       | $\Delta k_f^{CK} (s^{-1})$ |                  |
|------------------------------------------------|------------------|-------|----------------------------|------------------|
|                                                | r                | p     | r                          | p                |
| $\Delta$ BMI (kg/m <sup>2</sup> )              | 0.019            | 0.927 | 0.422                      | <b>0.032</b>     |
| $\Delta$ Body fat (% total)                    | -0.041           | 0.847 | 0.412                      | <b>0.014</b>     |
| $\Delta$ Myocardial triglyceride content (%)   | 0.008            | 0.978 | 0.099                      | 0.644            |
| $\Delta$ Fasting glucose (mg/dl)               | -0.019           | 0.928 | 0.314                      | 0.066            |
| $\Delta$ Fasting insulin (mIU/ml)              | -0.072           | 0.728 | 0.582                      | <b>&lt;0.001</b> |
| $\Delta$ LV EDV (ml)                           | 0.279            | 0.178 | 0.376                      | <b>0.009</b>     |
| $\Delta$ LVEF (%)                              | 0.090            | 0.804 | 0.342                      | 0.139            |
| $\Delta$ LV E/e'                               | 0.430            | 0.052 | -0.031                     | 0.890            |
| $\Delta$ BNP (pg/ml)                           | -0.022           | 0.930 | -0.243                     | 0.153            |
| $\Delta$ Peak VO <sub>2</sub> (ml/kg/ min)     | 0.183            | 0.439 | -0.198                     | 0.402            |
| $\Delta$ Absolute max VO <sub>2</sub> (ml/min) | 0.083            | 0.728 | 0.393                      | <b>0.015</b>     |

**Supplemental Table 6: Impact of unsuccessful weight loss on anthropomorphic and metabolic parameters**

|                                              | Successful weight loss<br>n=27 |           | Unsuccessful weight loss<br>n=9 |           |
|----------------------------------------------|--------------------------------|-----------|---------------------------------|-----------|
|                                              | Baseline                       | Follow-up | Baseline                        | Follow-up |
| Age (y)                                      | 51±13                          | -         | 53±15                           | -         |
| BMI (kg/m <sup>2</sup> )                     | 36±6.0                         | 32±5***   | 35±5                            | 36±4      |
| Body weight (kg)                             | 105±19                         | 94±18***  | 97±19                           | 101±23    |
| Body fat mass (kg)                           | 44±12                          | 35±12***  | 44±12                           | 44±14     |
| Systolic blood pressure (mmHg)               | 139±24                         | 127±11    | 143±17                          | 141±13    |
| Diastolic blood pressure (mmHg)              | 85±14                          | 81±9      | 85±7                            | 83±12     |
| <b>Metabolic status:</b>                     |                                |           |                                 |           |
| Visceral fat area (cm <sup>2</sup> )         | 172±79                         | 111±61*** | 135±60                          | 113±35    |
| Epicardial adipose tissue (cm <sup>3</sup> ) | 103±37                         | 84±31**   | -                               | -         |
| Liver fat (%)                                | 7.1±6.7                        | 3.1±3.3** | 6.4±9.3                         | 3.8±3.5   |
| Myocardial triglyceride (%)                  | 2.1±1.3                        | 1.4±0.8** | 1.9±0.9                         | 1.5±0.6   |
| Haemoglobin (g/dL)                           | 14.1±9.0                       | 14.0±7.8  | 13.9±1.7                        | 14.8±1.4  |
| Total cholesterol (mg/dL)                    | 213±39                         | 182±43**  | 201±58                          | 213±50    |
| Triglycerides (mg/dL)                        | 151±62                         | 124±71**  | 142±106                         | 133±71    |
| Fasting glucose (mg/dL)                      | 99±11                          | 90±11**   | 93±27                           | 88±14     |
| Fasting insulin (mIU/L)                      | 16±18                          | 7±4       | 16±12                           | 22±19     |
| HOMA-IR                                      | 3.0±1.6                        | 1.5±0.9** | 4.6±3.3                         | 6.2±4.9   |
| Leptin (ng/mL)                               | 59±43                          | 30±22**   | 54±18                           | 39±17*    |
| BNP (pg/mL)                                  | 15±8                           | 19±12     | 20±20                           | 14±6      |

\* indicates significant difference from baseline (\* p<0.05, \*\*p<0.01, \*\*\*p<0.001; # (unsuccessful weight loss group baseline data only) indicates significant difference from successful weight loss baseline)

**Supplemental Table 7: Impact of unsuccessful weight loss on cardiac and exercise parameters**

|                                                                    | Successful weight loss<br>n=27 |              | Unsuccessful weight loss<br>n=9 |           |
|--------------------------------------------------------------------|--------------------------------|--------------|---------------------------------|-----------|
|                                                                    | Baseline                       | Follow-up    | Baseline                        | Follow-up |
| <b>Cardiac parameters:</b>                                         |                                |              |                                 |           |
| <b>Left ventricle:</b>                                             |                                |              |                                 |           |
| End-diastolic volume (ml)                                          | 161±39                         | 154±38**     | 156±17                          | 145±16*   |
| LVEDV indexed to BSA (ml/m <sup>2</sup> )                          | 73±12                          | 74±13*       | 75±9                            | 68±9***   |
| End-systolic volume (ml)                                           | 55±17                          | 54±14        | 57±8                            | 56±14     |
| LVESV indexed to BSA (ml/m <sup>2</sup> )                          | 24±6                           | 26±5         | 27±2                            | 27±10     |
| Mass (g)                                                           | 116±33                         | 105±26**     | 115±29                          | 110±30    |
| LV mass indexed to BSA (g/m <sup>2</sup> )                         | 52±11                          | 51±8         | 54±11                           | 51±12     |
| Ejection fraction (%)                                              | 66±5                           | 65±5         | 64±2                            | 67±4      |
| E/e'                                                               | 9.0±1.6                        | 7.9±1.8**    | 10±4                            | 10±3      |
| Left atrial volume (mls)                                           | 82±23                          | 71±20***     | 72±12                           | 73±13     |
| LA vol indexed to BSA (ml/m <sup>2</sup> )                         | 37±8                           | 33±7**       | 34±7                            | 34±7      |
| <b>Right ventricle:</b>                                            |                                |              |                                 |           |
| End-diastolic volume (ml)                                          | 158±43                         | 149±45**     | 146±22                          | 142±16    |
| RVEDV indexed to BSA (ml/m <sup>2</sup> )                          | 72±14                          | 71±17        | 69±10                           | 66±4      |
| End-systolic volume (ml)                                           | 53±21                          | 53±22        | 48±12                           | 48±9      |
| RVESV indexed to BSA (ml/m <sup>2</sup> )                          | 24±7                           | 25±8         | 23±4                            | 22±4      |
| Ejection fraction (%)                                              | 67±6                           | 65±6         | 67±5                            | 66±6      |
| <b>Myocardial energetics:</b>                                      |                                |              |                                 |           |
| PCr/ATP                                                            | 1.9±0.3                        | 2.1±0.3*     | 1.8±0.3                         | 1.9±0.3   |
| CK forward rate constant (s <sup>-1</sup> )                        | 0.23±0.06                      | 0.16±0.06*** | 0.25±0.08                       | 0.22±0.11 |
| ATP delivery (PCr x k <sub>f</sub> <sup>CK</sup> )<br>(μmol/g/sec) | 2.5±0.8                        | 1.9±0.8*     | 2.6±1.1                         | 2.4±1.6   |
| <b>Exercise capacity:</b>                                          |                                |              |                                 |           |
| Peak VO <sub>2</sub> (ml/kg/min)                                   | 20±5                           | 20±5         | 19±4                            | 19±3      |
| Total VO <sub>2</sub> (ml/min)                                     | 2021±626                       | 1777±472**   | 1767±379                        | 1956±510* |
| VO <sub>2</sub> indexed to fat-free mass<br>(ml/kg/min)            | 36±8                           | 33±7**       | 34±4                            | 33±2      |

|                                   |           |           |           |           |
|-----------------------------------|-----------|-----------|-----------|-----------|
| Exercise time (min)               | 9±2       | 9±3       | 8±2       | 7±2       |
| RER                               | 1.13±0.07 | 1.11±0.07 | 1.10±0.12 | 1.10±0.04 |
| VE/VCO <sub>2</sub>               | 26±5      | 29±5**    | 26±5      | 26±5      |
| Heart rate reserve                | 0.78±0.24 | 0.86±0.21 | 0.77±0.13 | 0.73±0.07 |
| Six minute walk test distance (m) | 592±84    | 612±82    | 576±38    | 552±22    |

\* indicates significant difference from baseline (\* p<0.05, \*\*p<0.01, \*\*\*p<0.001; # (unsuccessful weight loss group baseline data only) indicates significant difference from successful weight loss baseline)

**Supplemental Figure 1: The contrasting effect of increasing visceral fat on PCr/ATP (A) and creatine kinase kinetics (B). Correlation coefficient displayed for combined groups.**

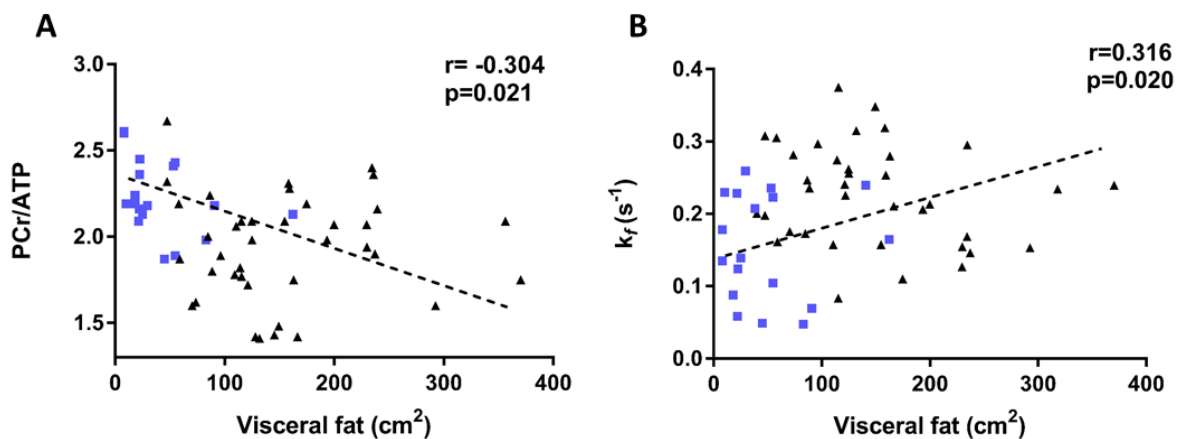

**Supplemental Figure 2: The change in creatine kinase  $k_f$  with dobutamine stress correlates with both peak  $VO_2$  (A) and heart rate reserve (B), when groups are combined.**

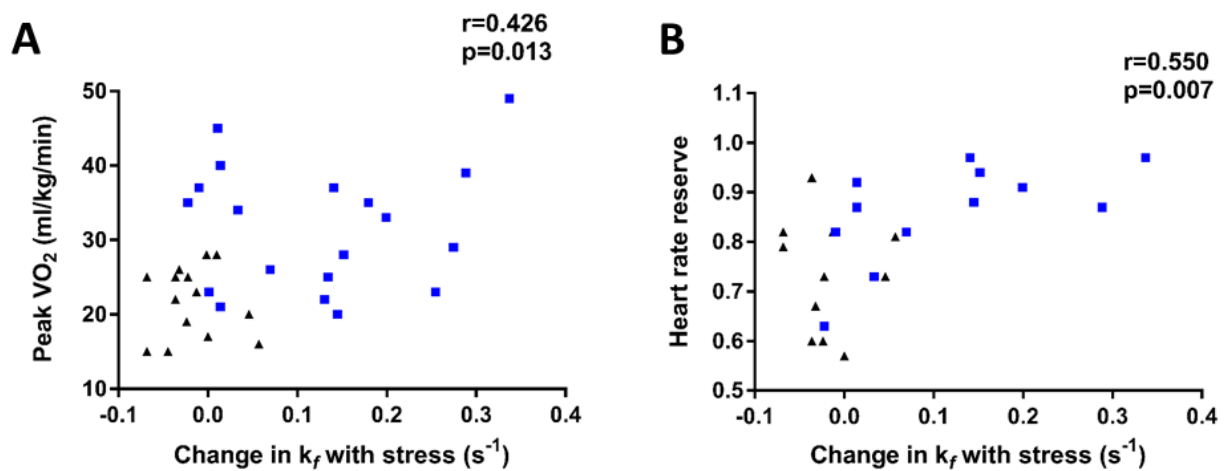



**Supplemental Figure 3: Weight change correlates with change in six minute walk test distance (A) and exercise time (B)**

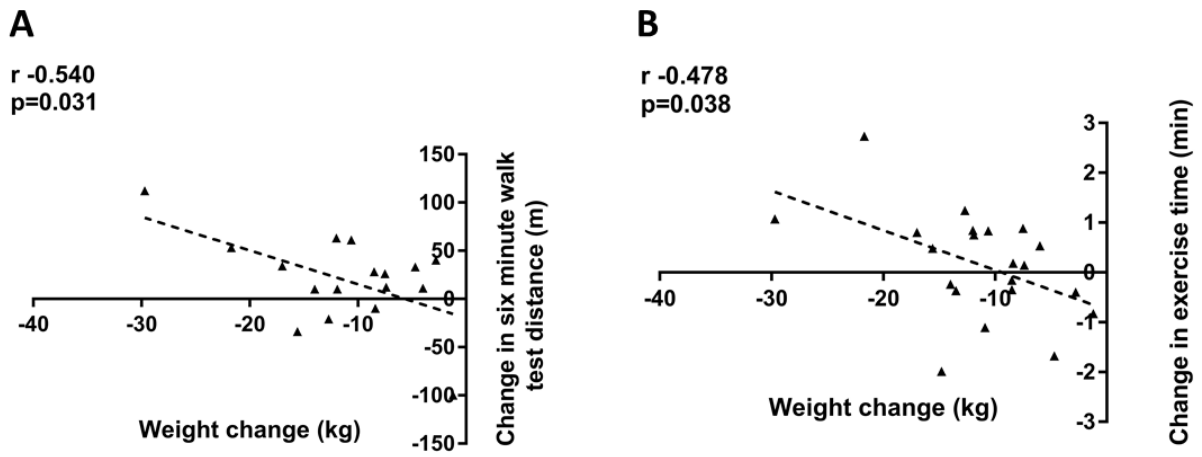

**Supplemental Figure 4: Weight loss may lead to a greater stress response of creatine kinase  $k_f$  (comparison of creatine kinase kinetics before and after weight loss intervention in the same 6 individuals)**

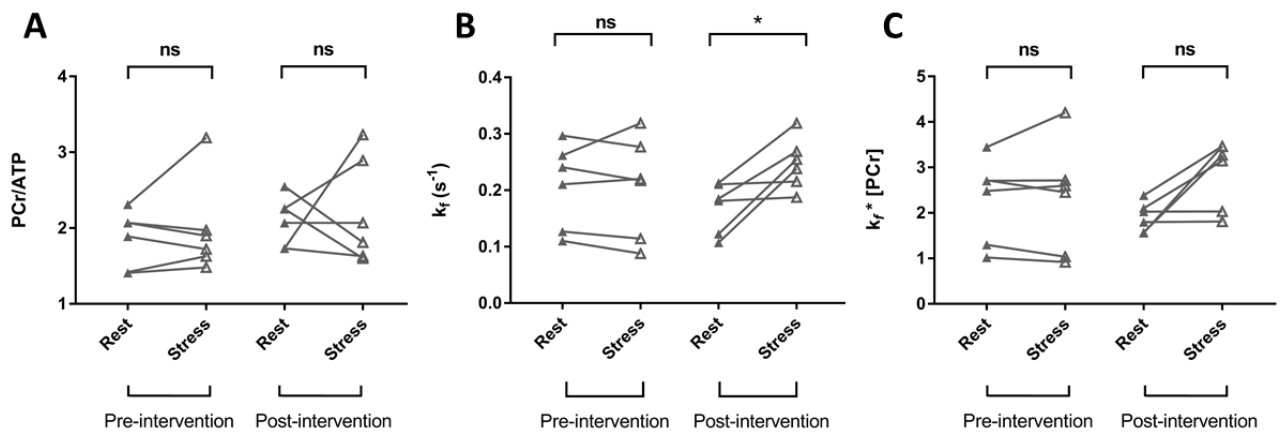

Supplement: cir-141-1152-s001.pdf [file cir-141-1152-s001.pdf]
